# Supplementary material
Source: publisher site journal article supplement (https://www.dovepress.com/get_supplementary_file.php?f=439750.docx)
Supplement: Supplementary file 1 [file get_supplementary_file.php]

**Supplemental File 1**

**Clinical Nutrition for body weight management program**

The body weight management program was individualized for the participants who wants to weight loss.

When the participants first visit the clinic, anthropometric measurements were collected. Height was measured using a stadiometer to the nearest 0.1 cm. Weight, fat mass (FM), fat-free mass (FFM) and %Body Fat were assessed using the Tanita Body Composition Analyzer MC-180 (Tanita Corporation, Tokyo, Japan). Body Mass Index (BMI) was calculated as weight (kg)/height (m2). Waist circumference (WC) was measured midway between the iliac crest and the lowermost margin of the ribs, with the participants breathing quietly. All the participants were be given the diet recommendations at baseline and every 4 weeks. Caloric intake was based on a 500-kcal deficit of the participants’ resting metabolic rate, which was determined by FFM.

**Supplemental File 2**

**Questionnaire about dietary behaviors and weight during quarantine**

The purpose of this questionnaire is to explore the association between dietary behaviors and weight change during the quarantine. This questionnaire does not involve the privacy of the participants. You can fill in the questionnaire voluntarily.

□ Yes, I would like to fill in the questionnaire

□ No, I don’t want to fill in the questionnaire

Name：________________ Sex：____________

Age: ____________ Height: ___________

**Basic characteristics**

1. Quarantine location： 1）home 2) other：______________
2. Length of quarantine (days)：_______________
3. Weight before the quarantine：________________
4. Weight after the quarantine：______________

**Diet quality and food consumption (compared to before the quarantine)**

1. Dietary quality: 1）improved 2) unchanged 3) decreased
2. Food consumption
3. cooked white rice: 1）increased 2）decreased 3）unchanged
4. convenient food: 1）increased 2）decreased 3）unchanged
5. whole grain: 1）increased 2）decreased 3）unchanged
6. soy and soy product: 1）increased 2）decreased 3）unchanged
7. meat: 1）increased 2）decreased 3）unchanged
8. vegetable: 1）increased 2）decreased 3）unchanged
9. fruit: 1）increased 2）decreased 3）unchanged
10. egg: 1）increased 2）decreased 3）unchanged
11. milk and dairy product: 1）increased 2）decreased 3）unchanged
12. alcohol/beverage: 1）increased 2）decreased 3）unchanged
13. snack: 1）increased 2）decreased 3）unchanged

**Meal time (compared to before the quarantine)**

1. Meal time：1）regular 2）unregular, earlier 3）unregular, delayed
2. Breakfast: 1）regular 2）unregular, earlier 3）unregular, delayed
3. Lunch: 1）regular 2）unregular, earlier 3）unregular, delayed
4. Dinner: 1）regular 2）unregular, earlier 3）unregular, delayed

**Physical activities (compared to before the quarantine)**

1. house working: 1）<30min 2) 30min-3h 3) >3h
2. participating in physical exercises: 1）<30min 2) 30min-3h 3) >3h
3. sedentary time: 1）<30min 2) 30min-3h 3) >3h
4. engaging in leisure entertainment activities: 1）<1h 2) 1-5h 3) >5h

**Sleep quality (compared to before the quarantine)**

1. quality: 1) improved 2) unchanged 3) decreased

**Supplementary Table 1** Change in dietary behaviors during quarantine (n=79)

| **Variables** | **Change in body weight** | | **OR [95% CI]** | ***P*-value** |
| --- | --- | --- | --- | --- |
| Weight Loss / unchanged (n=43) | Weight gain (n=36) |
| ***Dietary behaviors and meal time, n (%)*** |  |  |  |  |
| decreased dietary quality | 14 (17.7%) | 32 (40.5%) | 16.6 [4.90-56.10] | <0.001 |
| Delayed meal time | 12 (15.2%) | 25 (31.7%) | 5.87 [2.22-15.54] | <0.001 |
| Delayed breakfast time | 20 (25.3%) | 19 (24.1%) | 1.29 [0.53-3.12] | 0.58 |
| Delayed lunch time | 9 (11.4%) | 13 (16.5%) | 2.14 [0.79-5.81] | 0.14 |
| Delayed dinner time | 8 (10.1%) | 15 (19.0%) | 3.13 [1.13-8.62] | 0.03 |
| ***Food consumption, n (%)*** |  |  |  |  |
| Cooked white rice increased | 12 (15.2%) | 30 (38.0%) | 12.91 [4.29-38.84] | <0.001 |
| Convenient food increased | 12 (15.2%) | 32 (40.5%) | 20.67 [6.01-71.04] | <0.001 |
| Whole grain decreased | 20 (25.3%) | 22 (27.9%) | 1.81 [0.74-4.44] | 0.20 |
| Soy and soy productdecreased | 27 (34.2%) | 29 (36.7%) | 2.45 [0.88-6.88] | 0.09 |
| Meat decreased | 25 (31.7%) | 21 (26.6%) | 1.01 [0.41-2.47] | 0.99 |
| Vegetable decreased | 14 (17.7%) | 21 (26.6%) | 2.90 [1.16-7.27] | 0.02 |
| Fruit decreased | 27 (34.2%) | 25 (31.7%) | 1.35 [0.53-3.45] | 0.54 |
| Egg decreased | 5 (6.3%) | 9 (11.4%) | 2.53 [0.76-8.41] | 0.13 |
| Milk and dairy product decreased | 9 (11.4%) | 13 (16.5%) | 2.14 [0.79-5.81] | 0.14 |
| Alcohol/beverage increased | 5 (6.3%) | 15 (19.0%) | 5.43 [1.73-17.04] | <0.01 |
| Snack increased | 4 (5.1%) | 24 (30.4%) | 19.50 [5.64-67.42] | <0.001 |
| ***Physical activities, n (%)*** |  |  |  |  |
| House working time <30 minutes | 17 (21.5%) | 24 (30.4%) | 3.06 [1.21-7.71] | 0.02 |
| Physical exercise <30 minutes | 27 (34.2%) | 31 (39.2%) | 3.67 [1.19-11.36] | 0.02 |
| Sedentary time >3 hours | 31 (39.2%) | 22 (27.9%) | 0.61 [0.24-1.57] | 0.30 |
| Leisure entertainment activities>5 hours | 12 (15.2%) | 13 (16.5%) | 1.46 [0.56-3.78] | 0.44 |
| ***Sleep quality, n (%)*** |  |  |  |  |
| decreased sleep quality | 10 (12.7%) | 16 (20.3%) | 2.64 [1.01-6.94] | 0.05 |

**Notes:** Weight gain was defined as an increase of 1 kilogram or more and was used as the primary outcome measure. Improved/unchanged dietary and sleep quality; decreased/unchanged consumption of cooked white rice, convenient food, alcohol/beverage, and snack; increased/unchanged consumption of whole grain, soy and soy product, meat, vegetable and fruit, eggs, milk and dairy product; earlier/unchanged mealtime; daily house working time ≥30 minutes, physical activities ≥30 minutes, sedentary time ≤3 hours, and leisure entertainment activities ≤5 hours were treated as the reference points. Each of these variables was subjected to single regression analysis, and those with a *P*-value of less than 0.2 were included in the subsequent multivariable-adjusted stepwise logistic regression analyses. Abbreviation: **OR**, odds ratios; **CI**, confidence interval.
